# Supplementary material
Source: publisher figshare collection journal article supplement (https://acs.figshare.com/ndownloader/files/4663783)
Supplement: Supplementary file 1 [file 4663783]

# An Improved Cu-Based Catalyst System for the Reactions of Alcohols with Aryl Halides

*Ryan A. Altman, Alex Shafir, Alice Choi, Philip A. Lichtor, and Stephen L. Buchwald\**

Department of Chemistry, Massachusetts Institute of Technology

Cambridge, MA 02139

sbuchwal@mit.edu

## Supporting Information

### Table of Contents:

|                                                                                     |     |
|-------------------------------------------------------------------------------------|-----|
| General Considerations                                                              | S2  |
| General procedure for the Cu-catalyzed cross-coupling of alcohols with aryl halides | S3  |
| Experimental procedures for compounds in Table 2                                    | S4  |
| NMR Data                                                                            | S16 |
| References                                                                          | S37 |

## General Considerations

All reactions were carried out in resealable test tubes with teflon septa under a dry argon or nitrogen atmosphere. Copper(I) iodide (98%) was purchased from Strem. Me<sub>4</sub>Phen was purchased from Acros. The *Anhydrous finely powdered* Cs<sub>2</sub>CO<sub>3</sub> was a generous gift from Chemetall. This base was stored under nitrogen in a Vacuum Atmospheres glovebox. (The base is hygroscopic and excessive amounts of water lead to the formation of phenol and diaryl ether byproducts.) Small portions of the base (~5 g) were removed from the glovebox in glass vials, stored in the air in a desiccator filled with anhydrous calcium sulfate, and weighed in the air. Alcohols were purchased from commercial sources and used without further purification. Aryl halides were purchased from commercial sources and, when necessary, filtered through neutral alumina or distilled. Anhydrous toluene was purchased from J. T. Baker in CYCLE-TRAINER® solvent delivery kegs and vigorously purged with argon for 2 h. The solvent was further purified by passing it through two packed columns of neutral alumina under argon. The solvents were transferred by syringe from the solvent purification system to the reaction flask. Flash column chromatography was performed using a Biotage SP4 Flash Purification System using KP-Sil silica cartridges. In all cases, dichloromethane was used to transfer the crude reaction material onto the silica gel samplet. The samplet was dried in an oven prior to usage. A gradient elution using hexane and ethyl acetate was performed, based on the recommendation from the Biotage TLC Wizard.

Unless specified, yields reported in the publication are of the isolated material and represent an average of at least two independent runs. Yields reported in the supporting information refer to a single experiment. Compounds described in the literature were characterized by comparing their <sup>1</sup>H NMR and <sup>13</sup>C NMR spectra, and melting points (m.p.) to

the previously reported data; their purity was confirmed by gas chromatography (GC) or elemental analysis. GC analyses were performed on a Hewlett Packard 6890 instrument with an FID detector and a Hewlett Packard 10 m x 0.2 mm i.d. HP-1 capillary column using dodecane as an internal standard. Elemental analyses were performed by Atlantic Microlabs, Inc., Norcross, GA. Previously unknown compounds were synthesized, purified and analyzed from a single run and were then repeated to determine an average yield. They were characterized by  $^1\text{H}$  NMR,  $^{13}\text{C}$  NMR, m.p., IR and elemental analysis. For those compounds that did not give a satisfactory elemental analysis, a copy of their  $^1\text{H}$  NMR spectra is included.  $^1\text{H}$  NMR and  $^{13}\text{C}$  NMR spectra were recorded on Varian 500 MHz instruments with chemical shifts reported relative to the deuterated solvent or TMS. IR spectra were recorded on a Perkin-Elmer System 2000 FT-IR instrument for all previously unknown compounds (KBr disc). Melting points (uncorrected) were obtained on a Mel-Temp II capillary melting point apparatus.

#### **General procedure for the Cu-catalyzed cross-coupling of alcohols with aryl halides**

An oven-dried screw-cap test tube was charged with CuI (9.5 mg, 0.050 mmol),  $\text{Me}_4\text{Phen}$  (24 mg, 0.10 mmol), aryl halide (1.0 mmol, if solid),  $\text{Cs}_2\text{CO}_3$  (490 mg, 1.5 mmol), and a magnetic stir bar. The reaction vessel was fitted with a rubber septum. The test tube was evacuated and back-filled with dry argon. Aryl halide (1.0 mmol, if liquid), and toluene (0.50 mL) were then added by syringe. The rubber septum was removed and the reaction tube was quickly sealed with a Teflon-lined septum. The vessel was immersed in a pre-heated oil bath and stirred vigorously until TLC and/or GC analysis of the crude reaction mixture indicated that the aryl halide had been completely consumed. The reaction mixture was cooled to room temperature, diluted with ethyl acetate (15 mL), and filtered through a plug of silica, eluting with additional ethyl acetate

(30 mL). The filtrate was concentrated and the resulting residue was purified by flash chromatography (hexane/ethyl acetate) to provide the desired product.

### Experimental procedures for compounds in Table 2

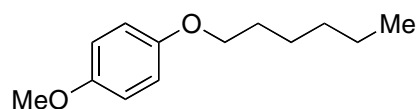

#### 4-(hexyloxy)-anisole (Entries 1-3)

The general procedure was followed using CuI (9.5 mg, 0.050 mmol), Me<sub>4</sub>Phen (24 mg, 0.10 mmol), Cs<sub>2</sub>CO<sub>3</sub> (391 mg, 1.2 mmol), 4-iodoanisole (234 mg, 1.00 mmol), and *n*-hexanol (186  $\mu$ L, 1.50 mmol) with toluene (0.50 mL) as solvent for 15 h at 80 °C. After cooling to room temperature, dodecane (225 mL, 1.0 mmol) and ethyl acetate (20 mL) were stirred into the reaction mixture. The mixture was filtered through a small plug of silica gel, and sampled for GC analysis. In order to standardize this compound for GC analysis, the product was purified by flash chromatography (hexane / ethyl acetate 1:0  $\rightarrow$  9:1) to afford the title compound as a colorless oil (162 mg, 78%). <sup>1</sup>H NMR (300 MHz, CDCl<sub>3</sub>)  $\delta$  6.85 (4H, s), 3.94-3.89 (3H, t, *J* = 6.6 Hz), 3.78 (3H, s), 1.79-1.72 (2H, m), 1.49-1.37 (2H, m), 1.36-1.32 (4H, m), 0.94-0.90 (3H, t, *J* = 7.0 Hz). <sup>13</sup>C NMR (125 MHz, CDCl<sub>3</sub>)  $\delta$  153.9, 153.5, 115.6, 115.0, 68.9, 56.0, 31.9, 29.6, 26.0, 22.9, 14.3. IR (KBr disc, cm<sup>-1</sup>) 2937, 1510, 1466, 1290, 1235, 1113, 1036, 827, 726, 532. Anal. Calc. for C<sub>13</sub>H<sub>20</sub>O<sub>2</sub>: C 74.96, H 9.68. Found: C 74.78, H 9.74.

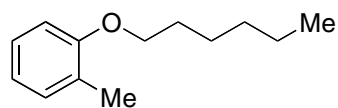

#### 2-(hexyloxy)-toluene (Entry 4)<sup>1</sup>

The general procedure was followed using CuI (9.5 mg, 0.050 mmol), Me<sub>4</sub>Phen (24 mg, 0.10

mmol), Cs<sub>2</sub>CO<sub>3</sub> (490 mg, 1.5 mmol), 2-iodotoluene (127  $\mu$ L, 1.00 mmol), and *n*-hexanol (187  $\mu$ L, 1.50 mol) with toluene (0.50 mL) as solvent for 24 h at 110 °C. Chromatographic purification (hexane / ethyl acetate 1:0  $\rightarrow$  9:1) afforded the title compound as a clear oil (159 mg, 83%). <sup>1</sup>H NMR (500 MHz, CDCl<sub>3</sub>)  $\delta$  7.16-7.12 (2H, m), 6.85-6.80 (2H, m), 3.96 (2H, t, *J* = 6.4 Hz), 2.23 (3H, s), 1.85-1.76 (2H, m), 1.56-1.32 (6H, m), 0.94-0.88 (3H, m). <sup>13</sup>C NMR (125 MHz, CDCl<sub>3</sub>)  $\delta$  157.6, 130.9, 127.1, 127.0, 120.3, 111.1, 68.1, 32.0, 29.7, 26.2, 23.0, 16.6, 14.4. IR (KBr disc, cm<sup>-1</sup>) 2955, 2931, 2860, 1603, 1496, 1463, 1379, 1245, 119, 1122, 1050, 749, 713. Anal. Calc. for C<sub>13</sub>H<sub>20</sub>O: C 81.20, H 10.48. Found: C 81.41, H 10.33.

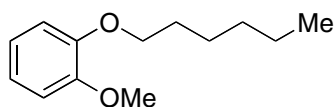

#### 2-(hexyloxy)-anisole (Entry 5)<sup>i</sup>

The general procedure was followed using CuI (9.5 mg, 0.050 mmol), Me<sub>4</sub>Phen (24 mg, 0.10 mmol), Cs<sub>2</sub>CO<sub>3</sub> (490 mg, 1.5 mmol), 2-iodoanisole (130  $\mu$ L, 1.00 mmol), and *n*-hexanol (187  $\mu$ L, 1.50 mol) with toluene (0.50 mL) as solvent for 30 h at 110 °C. Chromatographic purification (hexane / ethyl acetate 1:0  $\rightarrow$  9:1) afforded the title compound as a clear oil (195 mg, 94%). <sup>1</sup>H NMR (500 MHz, CDCl<sub>3</sub>)  $\delta$  6.92-6.90 (4H, m), 4.03 (2H, t, *J* = 7.0 Hz), 3.88 (3H, s), 1.86 (2H, m), 7.49-1.34 (8H, m), 0.93-0.90 (3H, m). <sup>13</sup>C NMR (125 MHz, CDCl<sub>3</sub>)  $\delta$  149.6, 148.8, 121.0, 121.0, 113.2, 112.0, 69.2, 56.2, 31.9, 29.4, 25.9, 22.8, 14.3. IR (KBr disc, cm<sup>-1</sup>) 2932, 2860, 1593, 1507, 1456, 1253, 1228, 1180, 1125, 1030, 740. Anal. Calc. for C<sub>13</sub>H<sub>20</sub>O<sub>2</sub>: C 74.96, H 9.68. Found: C 74.69, H 9.68.

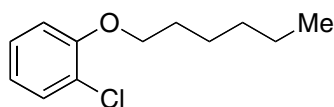

#### 1-chloro-2-(hexyloxy)benzene (Entry 6)<sup>ii</sup>

The general procedure was followed using CuI (9.5 mg, 0.050 mmol), Me<sub>4</sub>Phen (24 mg, 0.10 mmol), Cs<sub>2</sub>CO<sub>3</sub> (490 mg, 1.5 mmol), 1-chloro-2-iodobenzene (122  $\mu$ L, 1.00 mmol), and *n*-hexanol (187  $\mu$ L, 1.50 mol) with toluene (0.50 mL) as solvent for 24 h at 110 °C. Chromatographic purification (hexane / ethyl acetate 1:0  $\rightarrow$  1:3) afforded the title compound as a clear oil (185 mg, 87%). <sup>1</sup>H NMR (500 MHz, CDCl<sub>3</sub>)  $\delta$  7.36 (1H, dd, *J* = 1.7, 7.9 Hz), 7.20 (1H, m), 6.94-6.85 (2H, m), 4.03 (2H, t, *J* = 6.5 Hz), 1.85 (2H, m), 1.54-1.31 (m, 6H), 0.94-0.89 (m, 3H).

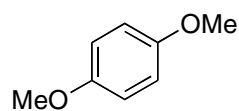

1,4-dimethoxybenzene (Entry 7)<sup>iii</sup>

The general procedure was followed using CuI (9.5 mg, 0.050 mmol), Me<sub>4</sub>Phen (24 mg, 0.10 mmol), Cs<sub>2</sub>CO<sub>3</sub> (391 mg, 1.2 mmol), 4-iodoanisole (234 mg, 1.00 mmol), and methanol (81  $\mu$ L, 2.00 mmol) with toluene (0.50 mL) as solvent for 15 h at 80 °C. Chromatographic purification (hexane / ethyl acetate 1:0  $\rightarrow$  9:1) afforded the title compound as a colorless oil (108 mg, 78%). <sup>1</sup>H NMR (300 MHz, CDCl<sub>3</sub>)  $\delta$  6.84 (4H, s), 3.77 (6H, s). IR (KBr disc, cm<sup>-1</sup>) 2933, 2860, 1509, 1467, 1233, 1181, 1107, 1042, 824, 742, 724, 523.

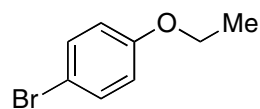

1-bromo-4-ethoxybenzene (Entry 8)<sup>iv</sup>

The general procedure was followed using CuI (9.5 mg, 0.050 mmol), Me<sub>4</sub>Phen (24 mg, 0.10 mmol), Cs<sub>2</sub>CO<sub>3</sub> (490 mg, 1.5 mmol), 1-bromo-4-iodobenzene (283 mg, 1.00 mmol), and ethanol (116  $\mu$ L, 2.0 mol) with toluene (0.50 mL) as solvent for 24 h at 80 °C. Chromatographic purification (hexane / ethyl acetate 1:0  $\rightarrow$  9:1) afforded the title compound as a clear oil (130

mg, 65%).  $^1\text{H}$  NMR (500 MHz,  $\text{CDCl}_3$ )  $\delta$  7.39-7.36 (2H, m), 6.80-6.77 (2H, m), 4.00 (2H, q,  $J$  = 7.0 Hz), 1.42 (t, 3H,  $J$  = 7.0 Hz).  $^{13}\text{C}$  NMR (125 MHz,  $\text{CDCl}_3$ )  $\delta$  158.2, 132.4, 116.4, 112.8, 63.9, 14.9. IR (KBr disc,  $\text{cm}^{-1}$ ) 2981, 2927, 1592, 1579, 1489, 1475, 1393, 1286, 1245, 1172, 1115, 1072, 1048, 1002, 923, 820, 639, 507. Anal. Calc. for  $\text{C}_8\text{H}_9\text{BrO}$ : C 47.79, H 4.51. Found: C 47.62, H 4.55.

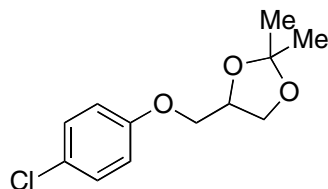

4-((4-chlorophenoxy)methyl)-2,2-dimethyl-1,3-dioxolane (Entry 9)

The general procedure was followed using CuI (9.5 mg, 0.050 mmol),  $\text{Me}_4\text{Phen}$  (24 mg, 0.10 mmol),  $\text{Cs}_2\text{CO}_3$  (650 mg, 2.0 mmol), 4-chloro-1-iodobenzene (238 mg, 1.00 mmol), and solketal (249  $\mu\text{L}$ , 2.00 mmol) with toluene (0.50 mL) as solvent for 15 h at 80  $^\circ\text{C}$ . Chromatographic purification (hexane / ethyl acetate 1:0  $\rightarrow$  9:1) afforded the title compound as a colorless oil (202 mg, 83%).  $^1\text{H}$  NMR (300 MHz,  $\text{CDCl}_3$ )  $\delta$  7.268-7.209 (2H, m), 6.872-6.819 (2H, m), 4.512-4.434 (1H, m), 4.192-4.143 (1H, dd,  $J$  = 6.4, 8.5 Hz), 4.046-3.996 (1H, dd,  $J$  = 5.5, 9.5 Hz), 3.938-3.868 (2H, m), 1.465 (3H, s), 1.407 (3H, s).  $^{13}\text{C}$  NMR (125 MHz,  $\text{CDCl}_3$ )  $\delta$  157.3, 129.5, 126.2, 116.0, 110.0, 74.1, 69.2, 66.9, 27.0, 25.5. IR (KBr disc,  $\text{cm}^{-1}$ ) 2980, 2932, 1489, 1451, 1371, 1240, 1203, 1169, 1152, 1075, 1051, 1000, 973, 893, 831, 658. Anal. Calc. for  $\text{C}_{12}\text{H}_{15}\text{ClO}_3$ : C 59.39, H 6.23. Found: C 59.57, H 6.30.

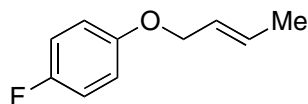

(*E*)-1-(but-2-enyloxy)-4-fluorobenzene (Entry 10)<sup>v</sup>

The general procedure was followed using CuI (9.5 mg, 0.050 mmol),  $\text{Me}_4\text{Phen}$  (24 mg, 0.10

mmol), Cs<sub>2</sub>CO<sub>3</sub> (490 mg, 1.5 mmol), 1-fluoro-4-iodobenzene (115  $\mu$ L, 1.00 mmol), and (E)-crotyl alcohol (127  $\mu$ L, 1.50 mol) with toluene (0.50 mL) as solvent for 24 h at 80 °C. Chromatographic purification (hexane / ethyl acetate 1:0  $\rightarrow$  9:1) afforded the title compound as a clear oil (117 mg, 70%). <sup>1</sup>H NMR (500 MHz, CDCl<sub>3</sub>)  $\delta$  7.00-6.95 (2H, m), 6.89-6.83 (2H, m), 5.90-5.83 (1H, m), 5.75-5.70 (1H, m), 4.343 (2H, dd, *J* = 0.9, 6.2 Hz), 1.77 (3H, d, *J* = 6.4 Hz). <sup>13</sup>C NMR (125 MHz, CDCl<sub>3</sub>)  $\delta$  156.4, 155.0, 130.9, 126.1, 116.0, 115.8, 69.5, 18.1. IR (KBr disc, cm<sup>-1</sup>) 3025, 2941, 2919, 2859, 1506, 1463, 1379, 1293, 1246, 1208, 1097, 1009, 967, 828, 780, 741, 514. Anal. Calc. for C<sub>10</sub>H<sub>11</sub>FO: C 72.27, H 6.67. Found: C 72.00, H 6.81.

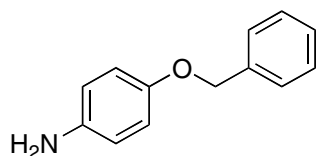

#### 4-(benzyloxy)aniline (Entry 11)<sup>vi</sup>

The general procedure was followed using CuI (9.5 mg, 0.050 mmol), Me<sub>4</sub>Phen (24 mg, 0.10 mmol), Cs<sub>2</sub>CO<sub>3</sub> (391 mg, 1.2 mmol), 4-iodoaniline (219 mg, 1.00 mmol), and benzyl alcohol (210  $\mu$ L, 2.00 mmol) with toluene (0.50 mL) as solvent for 15 h at 80°C. Chromatographic purification (hexane / ethyl acetate 1:0  $\rightarrow$  9:1) afforded the title compound as a red solid (158 mg, 79%). <sup>1</sup>H NMR (300 MHz, CDCl<sub>3</sub>)  $\delta$  7.45-7.32 (5H, m), 6.86-6.80 (2H, m), 6.68-6.63 (2H, m), 3.428 (2H, b s). <sup>13</sup>C NMR (125 MHz, CDCl<sub>3</sub>)  $\delta$  152.1, 140.4, 137.7, 128.7, 128.0, 127.7, 116.5, 116.2, 70.9. IR (KBr disc, cm<sup>-1</sup>) 2932, 2960, 1585, 1568, 1462, 1382, 1274, 1228, 1127, 1109, 1014, 829, 727, 673, 627, 423. m.p. 45-46.5 °C.

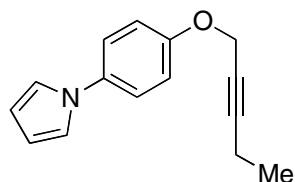



1-(4-(pent-2-ynyloxy)phenyl)-1*H*-pyrrole (Entry 12)

The general procedure was followed using CuI (9.5 mg, 0.050 mmol), Me<sub>4</sub>Phen (24 mg, 0.10 mmol), Cs<sub>2</sub>CO<sub>3</sub> (391 mg, 1.2 mmol), 1-(4-iodophenyl)pyrrole (269 mg, 1.00 mmol), and 2-pentyn-1-ol (139  $\mu$ L, 1.50 mmol) with toluene (0.50 mL) as solvent for 24 h at 80 °C. Chromatographic purification (hexane / ethyl acetate 1:0  $\rightarrow$  9:1) afforded the title compound as a white solid (209 mg, 92%). <sup>1</sup>H NMR (300 MHz, CDCl<sub>3</sub>)  $\delta$  7.35-7.30 (2H, m), 7.06-7.01 (4H, m), 6.34-6.33 (2H, t, *J* = 2.2 Hz), 4.71-4.70 (2H, , *J* = 2.2 Hz), 2.31-2.22 (2H, m), 1.19-1.14 (3H, t, *J* = 7.5 Hz). <sup>13</sup>C NMR (125 MHz, CDCl<sub>3</sub>)  $\delta$  156.0, 122.2, 119.9, 115.9, 110.1, 90.0, 74.1, 57.0, 44.8, 13.8, 12.7. IR (KBr disc, cm<sup>-1</sup>) 3132, 2977, 1522, 1325, 1258, 1243, 1190, 1070, 1018, 1006, 920, 824, 734. m.p. 57.5-59.0 °C.

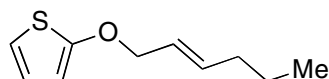*(E)*-2-(hex-2-enyloxy)thiophene (Entry 13)

The general procedure was followed using CuI (9.5 mg, 0.050 mmol), Me<sub>4</sub>Phen (24 mg, 0.10 mmol), Cs<sub>2</sub>CO<sub>3</sub> (650 mg, 2.0 mmol), 3-iodothiophene (102  $\mu$ L, 1.00 mmol), and *n*-hexanol (236  $\mu$ L, 2.00 mmol) with toluene (0.50 mL) as solvent for 15 h at 80 °C. Chromatographic purification (hexane / ethyl acetate 1:0  $\rightarrow$  12.5:1) afforded the title compound as a yellow oil (125 mg, 69%). <sup>1</sup>H NMR (300 MHz, CDCl<sub>3</sub>)  $\delta$  7.191-7.163 (1H, dd, *J* = 3.1, 5.3 Hz), 6.789-6.767 (1H, dd, *J* = 1.6, 5.3 Hz), 6.274-6.258 (1H, q, *J* = 1.6 Hz), 5.906-5.811 (1H, m), 5.765-5.666 (1H, m), 4.461-4.438 (2H, dd, *J* = 1.0, 6.0 Hz), 2.119-2.045 (2H, m), 1.507-1.384 (2H, m), 0.951-0.902 (3H, t, *J* = 7.3 Hz). <sup>13</sup>C NMR (125 MHz, CDCl<sub>3</sub>)  $\delta$  157.7, 136.1, 124.9, 124.7, 119.8, 97.6, 71.1, 34.6, 22.3, 13.9. IR (KBr disc, cm<sup>-1</sup>) 3118, 2959, 2929, 2871, 1544, 1421, 1366, 1234, 1177, 1010, 970, 873, 831, 752, 627. Anal. Calc. for C<sub>10</sub>H<sub>14</sub>OS: C 65.89, H 7.74.

Found: C 66.05, H 7.92.

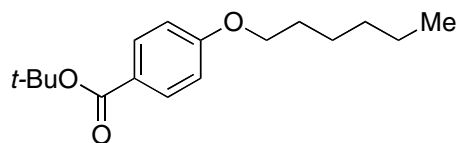

*tert*-butyl 4-(hexyloxy)benzoate (Entry 14)

The general procedure was followed using CuI (9.5 mg, 0.050 mmol), Me<sub>4</sub>Phen (24 mg, 0.10 mmol), Cs<sub>2</sub>CO<sub>3</sub> (490 mg, 1.5 mmol), *tert*-butyl-4-iodo benzoate<sup>vii</sup> (304 mg, 1.00 mmol), and *n*-hexanol (187  $\mu$ L, 1.50 mol) with toluene (0.50 mL) as solvent for 24 h at 80 °C. Chromatographic purification (hexane / ethyl acetate 1:0  $\rightarrow$  19:1) afforded a mixture of the title compound and *n*-hexyl 4-(hexyloxy)benzoate (7:1 by <sup>1</sup>H NMR and GC) as a clear oil (264 mg, 95%). <sup>1</sup>H NMR (500 MHz, CDCl<sub>3</sub>)  $\delta$  7.98-7.92 (2H, m), 6.92-6.87 (2H, m), 4.00 (2H, t, *J* = 6.6 Hz), 1.83-1.76 (2H, m), 1.49-1.44 (2H, m), 1.35-1.30 (2H, m), 0.92 (3H, m). <sup>13</sup>C NMR (125 MHz, CDCl<sub>3</sub>)  $\delta$  165.9, 162.8, 131.5, 124.4, 114.0, 80.6, 68.3, 31.8, 29.3, 28.5, 25.9, 22.8, 14.2. IR (KBr disc, cm<sup>-1</sup>) 2933, 2872, 1710, 1607, 1510, 1368, 1293, 1253, 1160, 1116, 1010, 848, 771, 696.

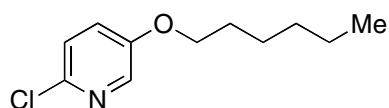

2-chloro-5-(hexyloxy)pyridine (Entry 15)

The general procedure was followed using CuI (9.5 mg, 0.050 mmol), Me<sub>4</sub>Phen (24 mg, 0.10 mmol), Cs<sub>2</sub>CO<sub>3</sub> (391 mg, 1.2 mmol), 2-chloro-5-iodopyridine (239 mg, 1.00 mmol), and *n*-hexanol (249  $\mu$ L, 2.00 mol) with toluene (0.50 mL) as solvent for 15 h at 80 °C. Chromatographic purification (hexane / ethyl acetate 1:0  $\rightarrow$  9:1) afforded the title compound as a colorless oil (179 mg, 84%). <sup>1</sup>H NMR (300 MHz, CDCl<sub>3</sub>)  $\delta$  8.03-8.02 (1H, dd, *J* = 0.8, 2.9 Hz), 7.22-7.19 (1H, dd, *J* = 0.8, 8.7 Hz), 7.17-7.14 (1H, dd, *J* = 2.9, 8.7 Hz), 3.99-3.94 (2H, t, *J* =

6.4), 1.80-1.73 (2H, m), 1.47-1.30 (6H, m), 0.92-0.87 (3H, m).  $^{13}\text{C}$  NMR (125 MHz,  $\text{CDCl}_3$ )  $\delta$  154.9, 142.6, 137.0, 125.2, 124.7, 69.3, 31.9, 29.4, 26.0, 23.0, 14.4. IR (KBr disc,  $\text{cm}^{-1}$ ) 2902, 2863, 1516, 1454, 1245, 1016, 917, 814, 736, 697, 517. Anal. Calc. for  $\text{C}_{11}\text{H}_{16}\text{ClNO}$ : C 61.82, H 7.55. Found: C 62.02, H 7.65.

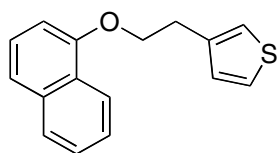

### 3-(2-(naphthalen-1-yloxy)ethyl)thiophene (Entry 16)

The general procedure was followed using CuI (9.5 mg, 0.050 mmol),  $\text{Me}_4\text{Phen}$  (24 mg, 0.10 mmol),  $\text{Cs}_2\text{CO}_3$  (490 mg, 1.5 mmol), 1-iodonaphthalene (175  $\mu\text{L}$ , 1.00 mmol), and 2-(3-thieno)-ethanol (168  $\mu\text{L}$ , 1.50 mol) with toluene (0.50 mL) as solvent for 24 h at 110  $^\circ\text{C}$ . Chromatographic purification (hexane / ethyl acetate 1:0  $\rightarrow$  9:1) afforded the title compound as a tan oil (252 mg, 99%).  $^1\text{H}$  NMR (500 MHz,  $\text{CDCl}_3$ )  $\delta$  8.31-8.29 (1H, m), 7.82 (1H, dd,  $J = 2.1$ , 6.4 Hz), 7.53-7.48 (1H, m), 7.45 (1H, d,  $J = 8.2$  Hz), 7.39 (1H, d,  $J = 8.0$  Hz), 7.31 (1H, dd,  $J = 2.9$ , 4.9 Hz), 7.19-7.18 (1H, m), 7.14 (1H, dd,  $J = 1.2$ , 4.9 Hz), 6.83 (1H, d,  $J = 7.5$  Hz), 4.38 (2H, d,  $J = 6.7$  Hz), 3.31 (2H, d,  $J = 6.4$  Hz).  $^{13}\text{C}$  NMR (125 MHz,  $\text{CDCl}_3$ )  $\delta$  154.7. 138.9. 134.7. 128.7. 127.7. 126.6. 126.0. 125.9. 125.7. 125.4. 122.2. 121.8. 120.5. 104.8. 68.4. 30.5. IR (KBr disc,  $\text{cm}^{-1}$ ) 3052, 2928, 2873, 1594, 1580, 1508, 1460, 1405, 1269, 1240, 1100, 1071, 1020, 790. Anal. for  $\text{C}_{16}\text{H}_{14}\text{OS}$ : C 75.55, H 5.55. Found: C 75.28, H 5.50.

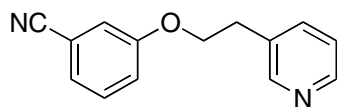

### 3-(2-(pyridin-3-yl)ethoxy)benzonitrile (Entry 17)

The general procedure was followed using CuI (9.5 mg, 0.050 mmol),  $\text{Me}_4\text{Phen}$  (24 mg, 0.10 mmol),  $\text{Cs}_2\text{CO}_3$  (490 mg, 1.5 mmol), 3-iodobenzonitrile (229 mg, 1.00 mmol), and 2-(3-

pyridyl)ethanol (172  $\mu$ L, 1.50 mmol) with toluene (0.50 mL) as solvent for 24 h at 80  $^{\circ}$ C. Chromatographic purification (hexane / ethyl acetate 1:0  $\rightarrow$  3:1) afforded the title compound as a clear oil (174 mg, 78%).  $^1\text{H}$  NMR (500 MHz,  $\text{CDCl}_3$ )  $\delta$  8.56 (1H, d,  $J$  = 2.2 Hz), 8.22 (1H, dd,  $J$  = 1.6, 4.7 Hz), 7.65-7.60 (1H, m), 7.40-7.33 (1H, m), 7.29-7.23 (2H, m), 7.13-7.09 (2H, m), 4.20 (2H, t,  $J$  = 6.5 Hz), 3.12 (2H, t,  $J$  = 6.5 Hz).  $^{13}\text{C}$  NMR (125 MHz,  $\text{CDCl}_3$ )  $\delta$  158.8, 150.5, 148.5, 136.6, 133.6, 130.6, 125.0, 123.6, 119.9, 118.8, 117.6, 113.4, 68.5, 33.0. IR (KBr disc,  $\text{cm}^{-1}$ ) 3033, 2934, 2878, 2230, 1597, 1578, 1480, 1431, 1328, 1292, 1148, 1033, 971, 715, 682. Anal. Calc. for  $\text{C}_{14}\text{H}_{12}\text{N}_2\text{O}$ : C 74.98, H 5.39.

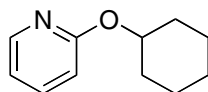

#### 2-(cyclohexyloxy)pyridine (Entry 18)

The general procedure was followed using CuI (9.5 mg, 0.050 mmol),  $\text{Me}_4\text{Phen}$  (24 mg, 0.10 mmol),  $\text{Cs}_2\text{CO}_3$  (490 mg, 1.5 mmol), 4  $\text{\AA}$  molecular sieves (200 mg, flame activated under vacuum) 2-iodopyridine (106  $\mu$ L, 1.00 mmol), and cyclohexanol (158  $\mu$ L, 1.50 mmol) with toluene (0.50 mL) as solvent for 24 h at 110  $^{\circ}$ C. Chromatographic purification (hexane / ethyl acetate 1:0  $\rightarrow$  9:1) afforded the title compound as a clear oil (164 mg, 93%).  $^1\text{H}$  NMR (500 MHz,  $\text{CDCl}_3$ )  $\delta$  8.14 (1H, ddd,  $J$  = 0.8, 2.1, 5.0 Hz), 7.54 (1H, ddd,  $J$  = 2.0, 7.2, 8.4 Hz), 6.81 (1H, ddd,  $J$  = 0.9, 5.0, 7.1 Hz), 6.69 (1H, dt,  $J$  = 8.4, 0.8 Hz), 5.06-5.00 (1H, m), 2.05-2.01 (2H, m), 1.82-1.76 (2H, m), 1.66-1.39 (4H, m), 1.34-1.25 (2H, m).  $^{13}\text{C}$  NMR (125 MHz,  $\text{CDCl}_3$ )  $\delta$  163.7, 147.1, 138.7, 116.4, 111.9, 73.2, 32.1, 25.9, 24.2. IR (KBr disc,  $\text{cm}^{-1}$ ) 3025, 2942, 1614, 1516, 1328, 1249, 1161, 1110, 1061, 961, 837, 749. Anal. Calc. for  $\text{C}_{11}\text{H}_{15}\text{NO}$ : C 74.54, H 8.53. Found: C 74.50, H 8.63.

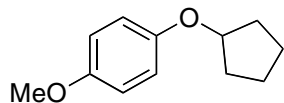

### 1-(cyclopentyloxy)-4-methoxybenzene (Entry 19)<sup>viii</sup>

The general procedure was followed using CuI (9.5 mg, 0.050 mmol), Me<sub>4</sub>Phen (24 mg, 0.10 mmol), Cs<sub>2</sub>CO<sub>3</sub> (490 mg, 1.5 mmol), 4-iodoanisole (234 mg, 1.00 mmol), and cyclopentanol (136  $\mu$ L, 1.50 mol) with toluene (0.50 mL) as solvent for 24 h at 110 °C. Chromatographic purification (hexane / ethyl acetate 1:0  $\rightarrow$  9:1) afforded the title compound as a clear oil (168 mg, 88%). <sup>1</sup>H NMR (500 MHz, CDCl<sub>3</sub>)  $\delta$  6.83 (4H, s), 4.71-4.66 (1H, m), 3.78 (3H, s), 1.90-1.76 (6H, m), 1.65-1.56 (2H, m). <sup>13</sup>C NMR (125 MHz, CDCl<sub>3</sub>)  $\delta$  152.3, 116.8, 114.8, 80.0, 55.9, 33.0, 24.2. IR (KBr disc, cm<sup>-1</sup>) 2960, 2872, 1833, 1507, 1465, 1441, 1231, 1173, 1106, 1040, 990, 824. Anal. Calc. for C<sub>12</sub>H<sub>16</sub>O<sub>2</sub>: C 74.97, H 8.39. Found: C 74.56, H 8.25.

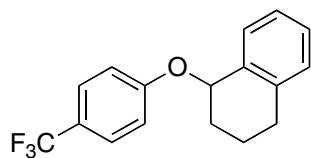

### 1-(4-(trifluoromethyl)phenoxy)-1,2,3,4-tetrahydronaphthalene (Entry 20)

The general procedure was followed using CuI (9.5 mg, 0.050 mmol), Me<sub>4</sub>Phen (24 mg, 0.10 mmol), Cs<sub>2</sub>CO<sub>3</sub> (490 mg, 1.5 mmol), 4-iodobenzotrifluoride (147  $\mu$ L, 1.00 mmol), and ( $\pm$ )-1-tetralol (222 mg, 1.50 mol) with toluene (0.50 mL) as solvent for 24 h at 110 °C. Chromatographic purification (hexane / ethyl acetate 1:0  $\rightarrow$  9:1) afforded the title compound as a clear oil (217 mg, 75%). <sup>1</sup>H NMR (500 MHz, CDCl<sub>3</sub>)  $\delta$  7.59 (2H, d, *J* = 8.8 Hz), 7.36-7.19 (4H, m), 7.10 (d, *J* = 8.8 Hz), 5.47 (1H, t, *J* = 4.3 Hz), 2.96-2.91 (1H, m), 2.84-2.78 (1H, m), 2.21-2.15 (1H, m), 2.09-1.99 (2H, m), 1.87-1.80 (1H, m). <sup>13</sup>C NMR (125 MHz, CDCl<sub>3</sub>)  $\delta$  138.0, 135.1, 129.6, 129.4, 128.4, 127.3, 127.2, 127.1, 126.4, 116.1, 74.2, 29.2, 28.0, 18.9. IR (KBr

disc,  $\text{cm}^{-1}$ ) 3024, 2942, 1614, 1516, 1328, 1250, 1161, 1110, 1061, 961, 837, 749. Anal. Calc. for  $\text{C}_{17}\text{H}_{15}\text{F}_3\text{OX}$ : C 69.85, H 5.17. Found: C 69.74, H 5.24.

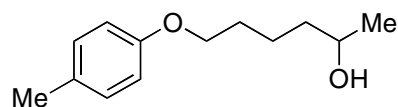

1-(*p*-tolylloxy)hexan-5-ol (Entry 21)

The general procedure was followed using CuI (9.5 mg, 0.050 mmol),  $\text{Me}_4\text{Phen}$  (24 mg, 0.10 mmol),  $\text{Cs}_2\text{CO}_3$  (490 mg, 1.5 mmol), 4-iodotoluene (218 mg, 1.00 mmol), and 1,5-hexanediol (181  $\mu\text{L}$ , 1.50 mmol) with toluene (0.50 mL) as solvent for 24 h at 80  $^\circ\text{C}$ . Chromatographic purification (hexane / ethyl acetate 1:0  $\rightarrow$  4:1) afforded the title compound as a clear oil (156 mg, 75%).  $^1\text{H}$  NMR (500 MHz,  $\text{CDCl}_3$ )  $\delta$  7.09-7.07 (2H, m), 6.82-6.79 (2H, m), 3.95 (2H, t,  $J$  = 6.5 Hz), 6.87-3.81 (1H, m), 2.30 (3H, t), 1.83-1.78 (2H, m), 1.61-1.47 (6H, m), 1.22 (3H, dd,  $J$  = 0.6, 6.3 Hz).  $^{13}\text{C}$  NMR (125 MHz,  $\text{CDCl}_3$ )  $\delta$  157.1, 130.0, 129.9, 114.5, 68.2, 68.0, 39.2, 29.5, 23.7, 22.6, 20.7. IR (KBr disc,  $\text{cm}^{-1}$ ) 3363 (br), 3031, 2940, 2867, 1614, 1584, 1512, 1474, 1376, 1291, 1244, 1176, 1111, 1037, 952, 818, 511.

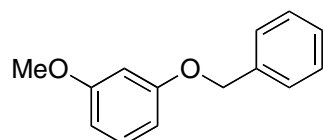

1-(benzyloxy)-3-methoxybenzene (Entry 22)<sup>ix</sup>

The general procedure was followed using CuI (19 mg, 0.050 mmol),  $\text{Me}_4\text{Phen}$  (48 mg, 0.10 mmol),  $\text{Cs}_2\text{CO}_3$  (490 mg, 1.5 mmol), 3-bromoanisole (127  $\mu\text{L}$ , 1.00 mmol), and benzyl alcohol (155  $\mu\text{L}$ , 1.50 mmol) with toluene (0.50 mL) as solvent for 24 h at 110  $^\circ\text{C}$ . Chromatographic purification (hexane / ethyl acetate 1:0  $\rightarrow$  9:1) afforded the title compound as a clear oil (199 mg, 93%).  $^1\text{H}$  NMR (500 MHz,  $\text{CDCl}_3$ )  $\delta$  7.51-7.36 (5H, m), 7.23 (1H, m), 6.64-6.57 (3H, m), 5.08 (2H, s), 3.82 (3H, s).  $^{13}\text{C}$  NMR (125 MHz,  $\text{CDCl}_3$ )  $\delta$  161.0, 160.2, 137.1, 130.1, 128.8,

128.1, 127.7, 107.1, 106.7, 101.5, 70.2, 55.4. IR (KBr disc,  $\text{cm}^{-1}$ ) 3032, 2939, 2835, 1592, 1492, 1453, 1381, 1288, 1264, 1199, 1151, 1082, 1045, 835, 761, 734, 697. Anal. Calc. for  $\text{C}_{14}\text{H}_{14}\text{O}_2$ : C 78.48, H 6.59. Found: C 78.39, H 6.59.

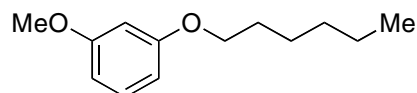

### 3-(hexyloxy)-anisole (Entry 23)<sup>x</sup>

The general procedure was followed using CuI (9.5 mg, 0.050 mmol),  $\text{Me}_4\text{Phen}$  (24 mg, 0.10 mmol),  $\text{Cs}_2\text{CO}_3$  (490 mg, 1.5 mmol), 3-bromoanisole (127  $\mu\text{L}$ , 1.00 mmol), and *n*-hexanol (0.5 mL) as solvent for 24 h at 130 °C. Chromatographic purification (hexane / ethyl acetate 1:0  $\rightarrow$  9:1) afforded the title compound as a clear oil (160 mg, 77%).  $^1\text{H}$  NMR (500 MHz,  $\text{CDCl}_3$ )  $\delta$  7.19 (1H, t,  $J = 4.5$  Hz), 6.53-6.48 (3H, m), 3.95 (2H, t,  $J = 6.7$  Hz), 3.79 (3H, s), 1.81-1.76 (2H, m), 1.49-1.45 (2H, m), 1.38-1.33 (4H, m), 0.94-0.91 (3H, m).  $^{13}\text{C}$  NMR (125 MHz,  $\text{CDCl}_3$ )  $\delta$  161.0, 160.6, 130.0, 106.8, 106.3, 101.1, 77.0, 55.5, 31.8, 29.5, 26.0, 22.8, 14.3. IR (KBr disc,  $\text{cm}^{-1}$ ) 3000, 2933, 2887, 1599, 1493, 1468, 1455, 1334, 1287, 1265, 1201, 1153, 1046, 835, 762, 687.









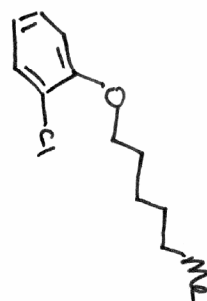

```

RAVIT160R
exp5 stdih
SAMPLE
date Aug 23 2007 dfreq DEC. 8 VT
solvent Aug CDC13 dn H1
file ACQUISITION exp dpwr 30
sfrq 300.101 dm dof 0
IN 4.103 dm C
NU 4.103 dm C
SW 6002.4 wfile PROCESSING 200
fb not used proc ft
bs 2 fn 131072
tpwr 54 weff
pw 8.0 weff
tof 0.135 weff
nt 867.7 wnt
ct 16 wnt
alock not used
gain not used
flags
il n
in n
dp y
DISPLAY -13.3
sp wp 3107.6
vs 191
vc 250
wc 12.43
hzmm 500.00
ts 2778.7
rfi 2181.7
tfs 2.000
nm
ph

```

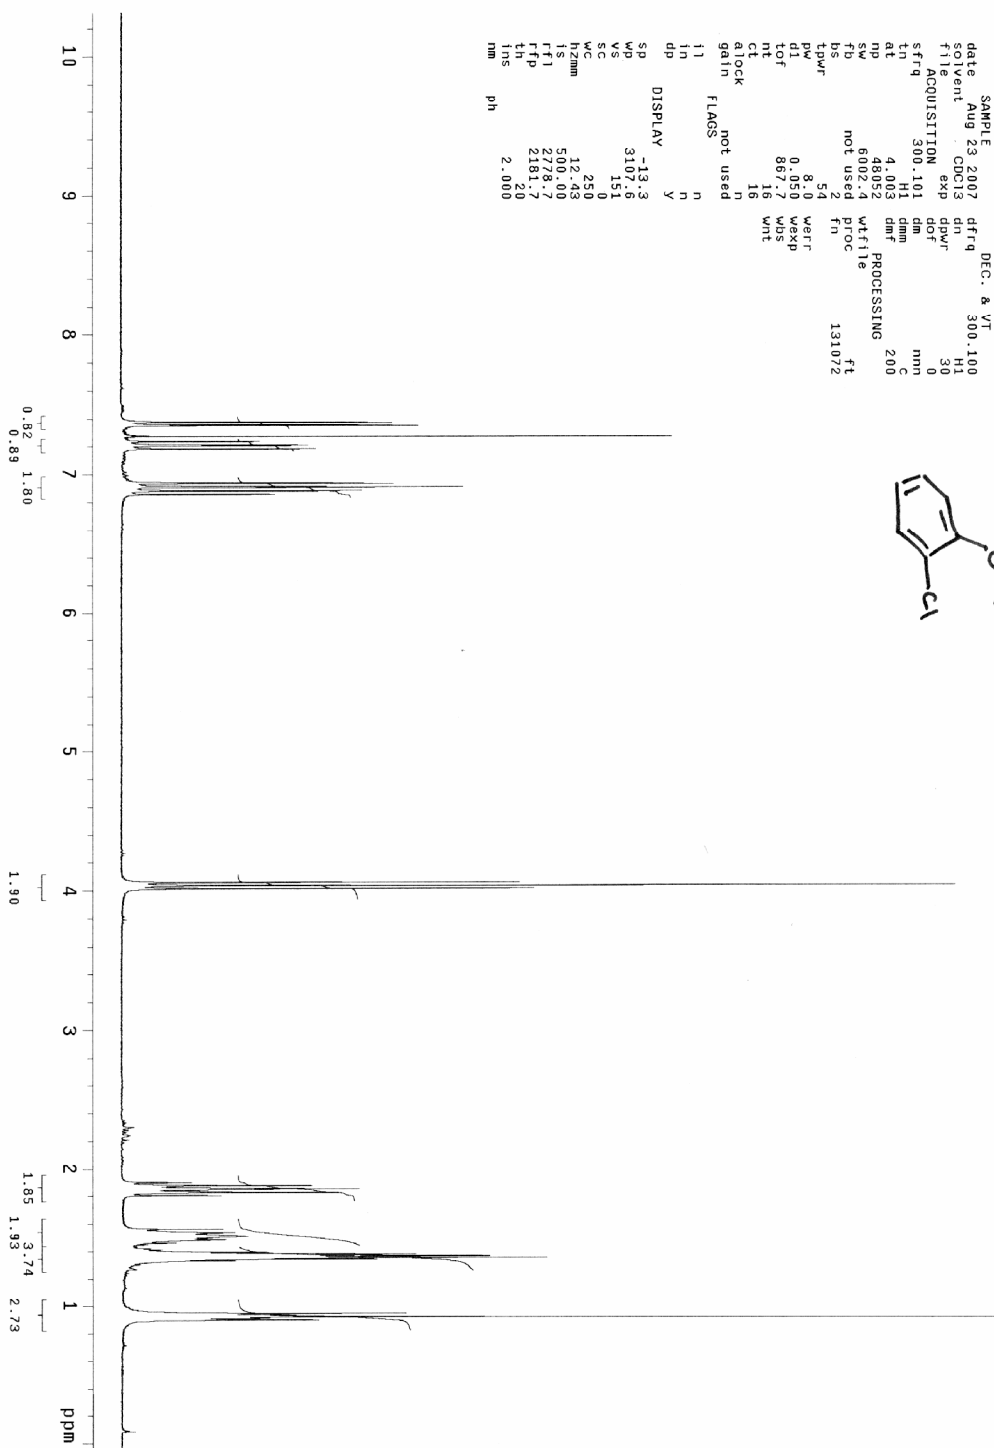





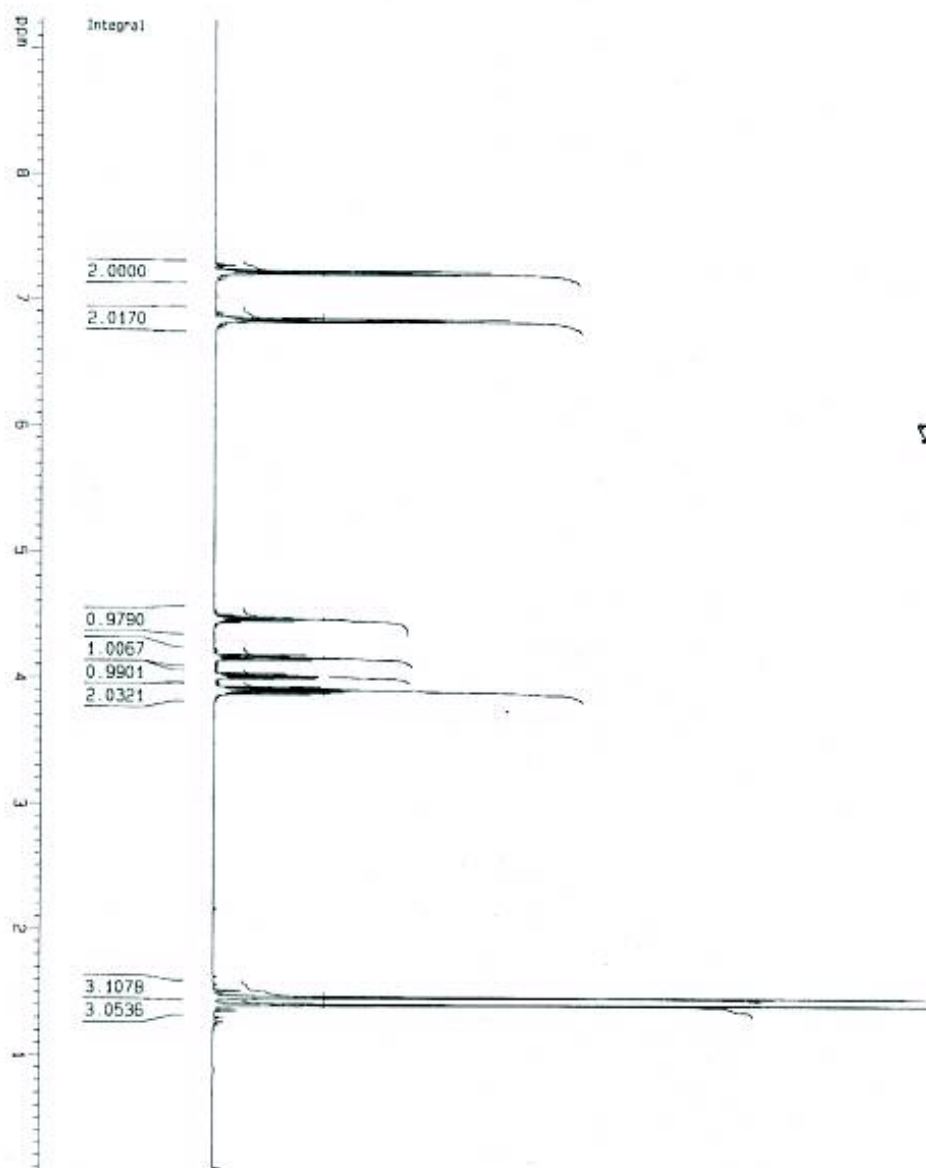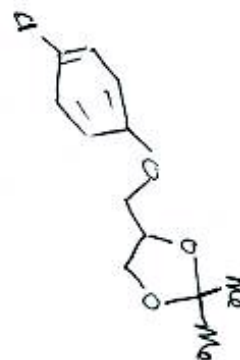

Current Data Parameters  
NAME pa1-1-B1  
EXPNO 1  
PROCNO 1

F2 - Acquisition Parameters  
Date\_ 20060127  
Time 13.02  
INSTRUM spect  
PROBHD Sph 800 00-1  
PULPROG zg30  
TO 65536  
SOLVENT CDCl<sub>3</sub>  
NS 18  
DS 2  
SWH 8270.140 Hz  
FIDRES 0.126314 Hz  
AQ 3.564243 sec  
RG 31.3  
DM 60.400 usac  
DE 5.00 usac  
TE 300.0 K  
D1 1.0000000 sec

===== CHANNEL f1 =====  
NUC1 1H  
P1 7.50 usac  
PL1 0.00 dB  
SFO1 400.1326710 MHz

F2 - Processing parameters  
SI 32768  
SF 400.130000 MHz  
WDM 4  
SSB 0  
LB 0.30 Hz  
GB 0  
PC 1.00

TD 65536  
FID 20.00 cm  
F1P 9.240 D08  
F2P 3637.36 Hz  
F2 0.045 G08  
PCWDW 0.45875 sec/cm  
WDM 183.52682 Hz/cm









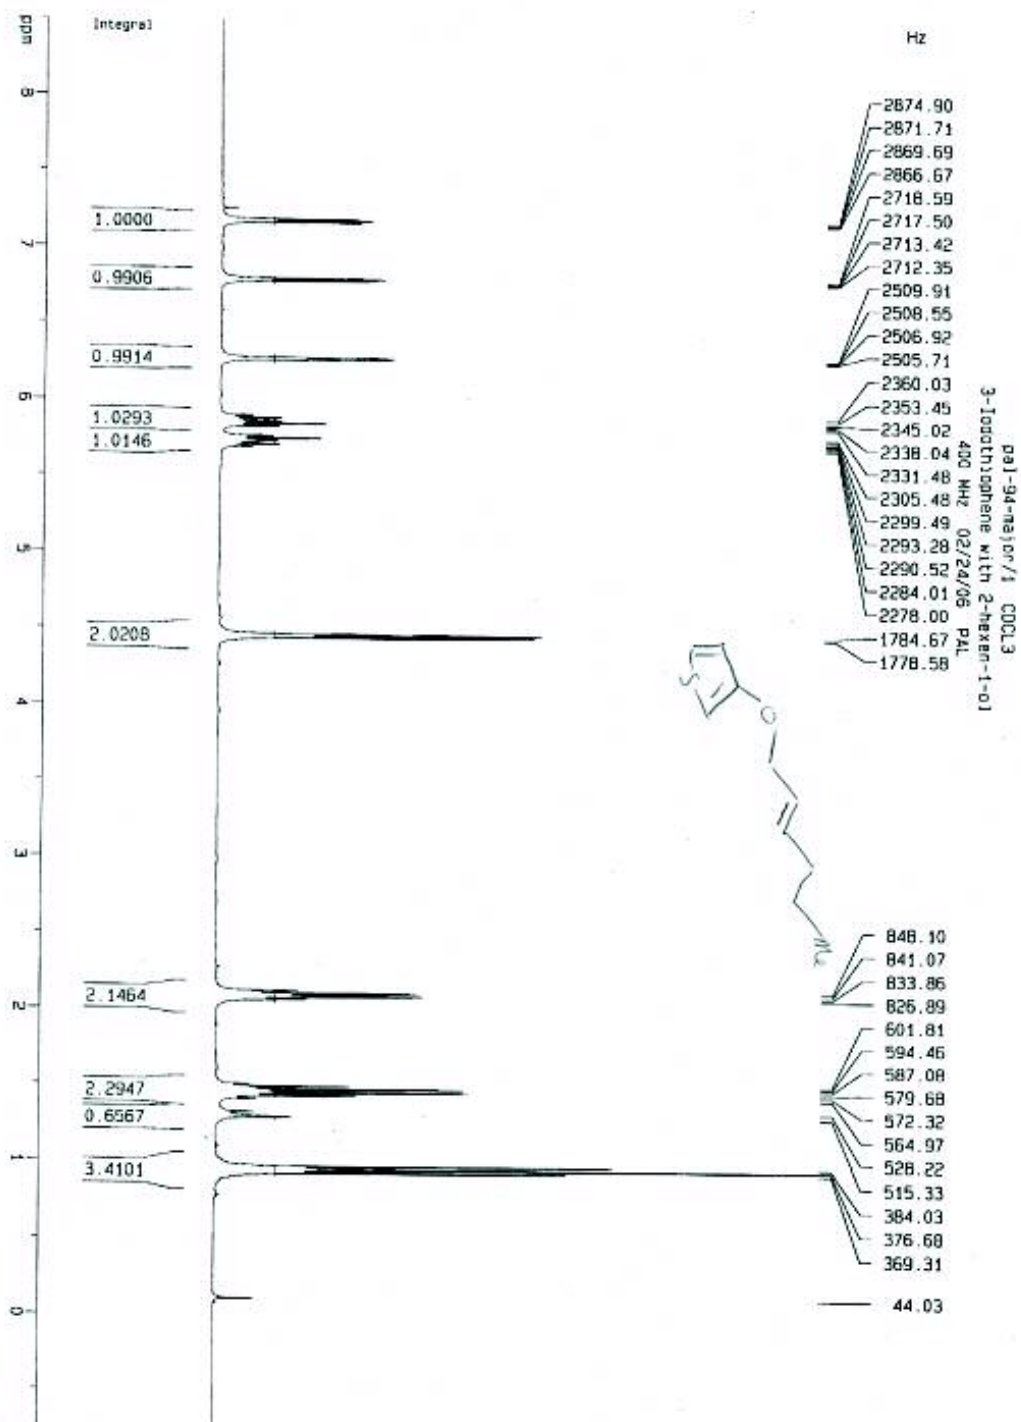



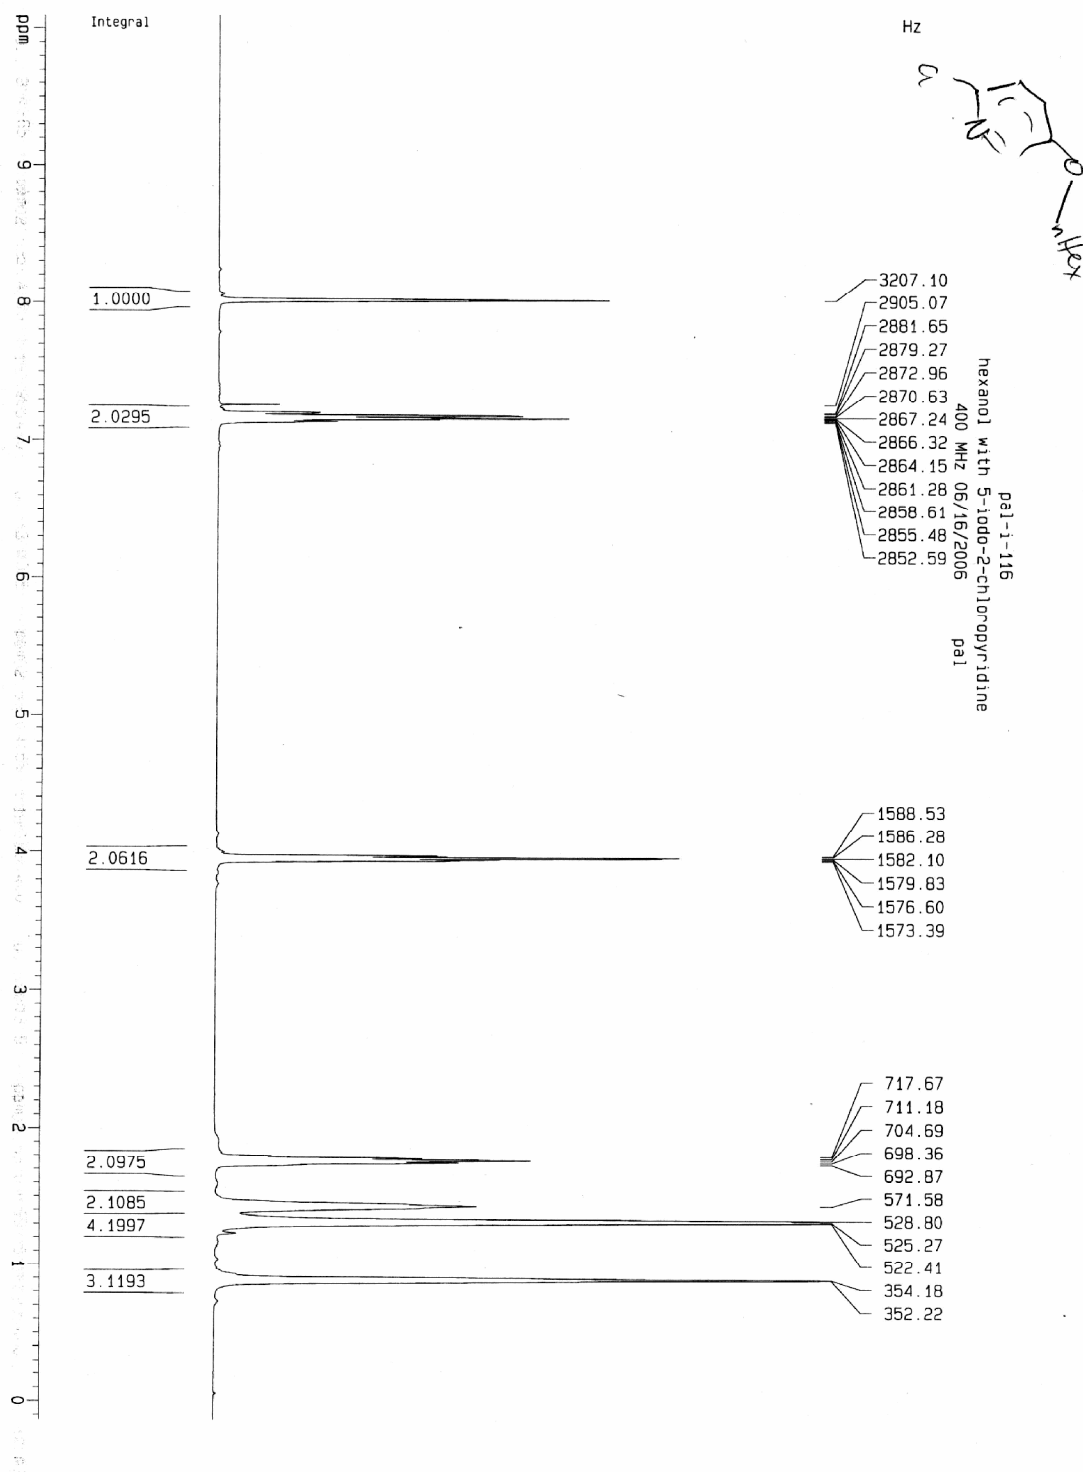

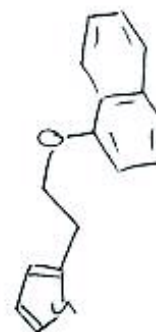

```

RAW1110
expt 12pul
SAMPLE
date Jun 14 2017 07:00 125.795
solvent CDCl3 on 013
file exp dpr 37
ACQUISITION
sfrq 500.235 MHz 4
at 3.200 dat 13808
sv 10180.3 dres 1.0
tb not used homo n
bs 1
pc 1
pwr 5.0 PROC 116
pl 0 each 131872
dt 0
tof 1498.2
nt 16
ct 16
at 16
block not used
Data not used
NAME
11 n
1n n
dp y
hs nm
SD O15PLAY -83.2
MP 5153.0
VS 151
SC 0
WC 250
hzem 128.40
128.40
131.1
4832.0
CTO 3835.7
th 16
ins 2.800
nm pH

```

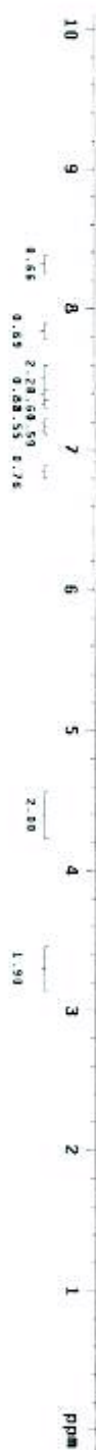

c1ccc(cc1)OCCc2ccccc2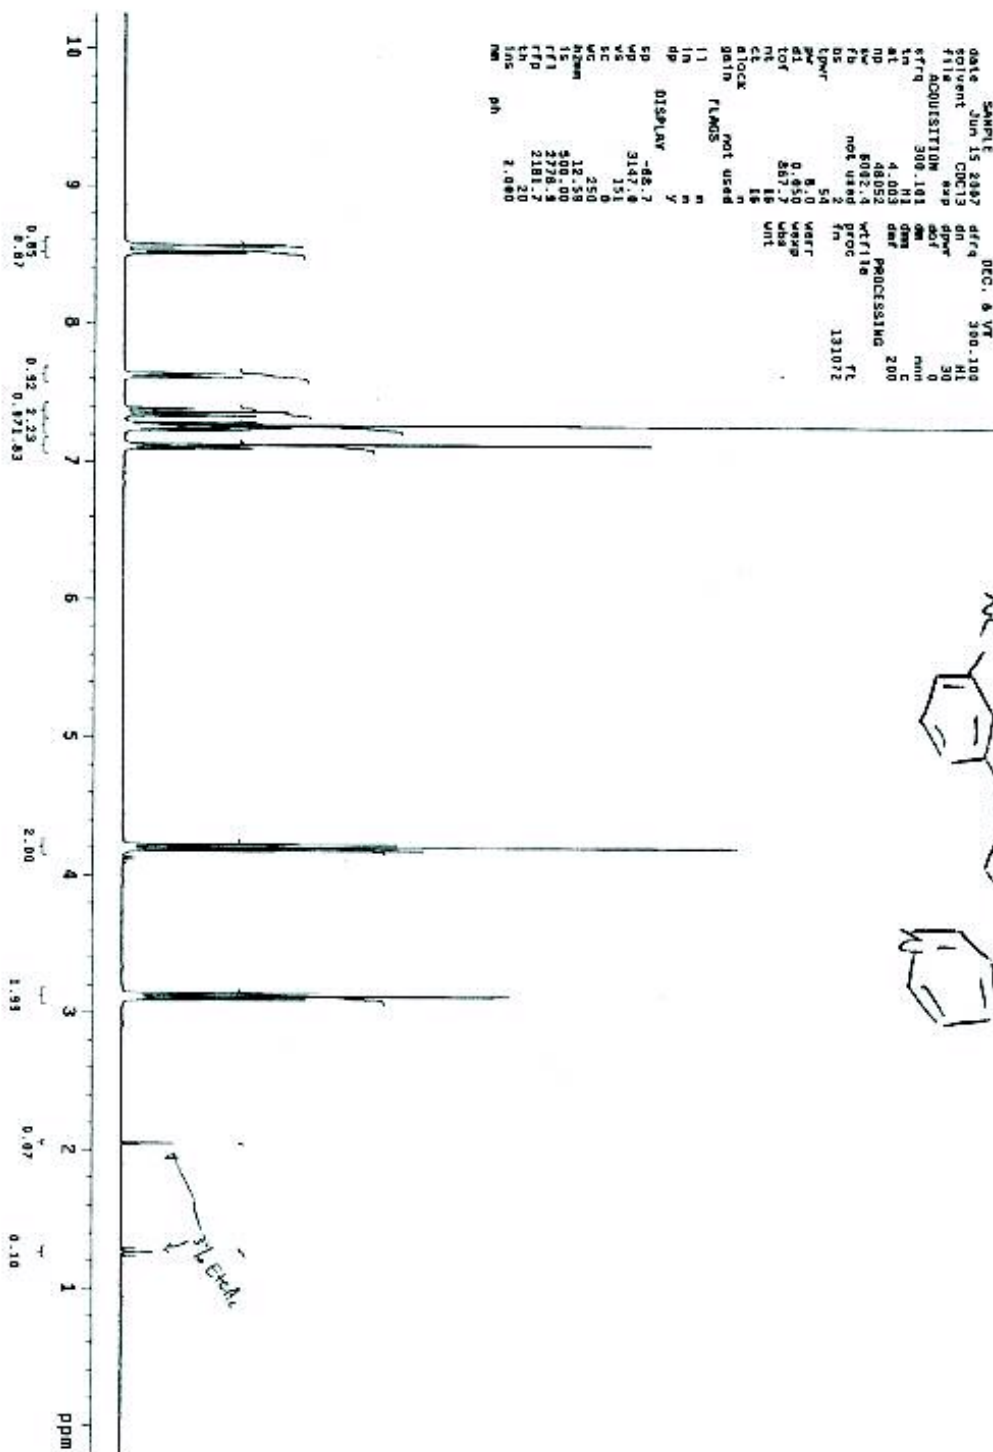

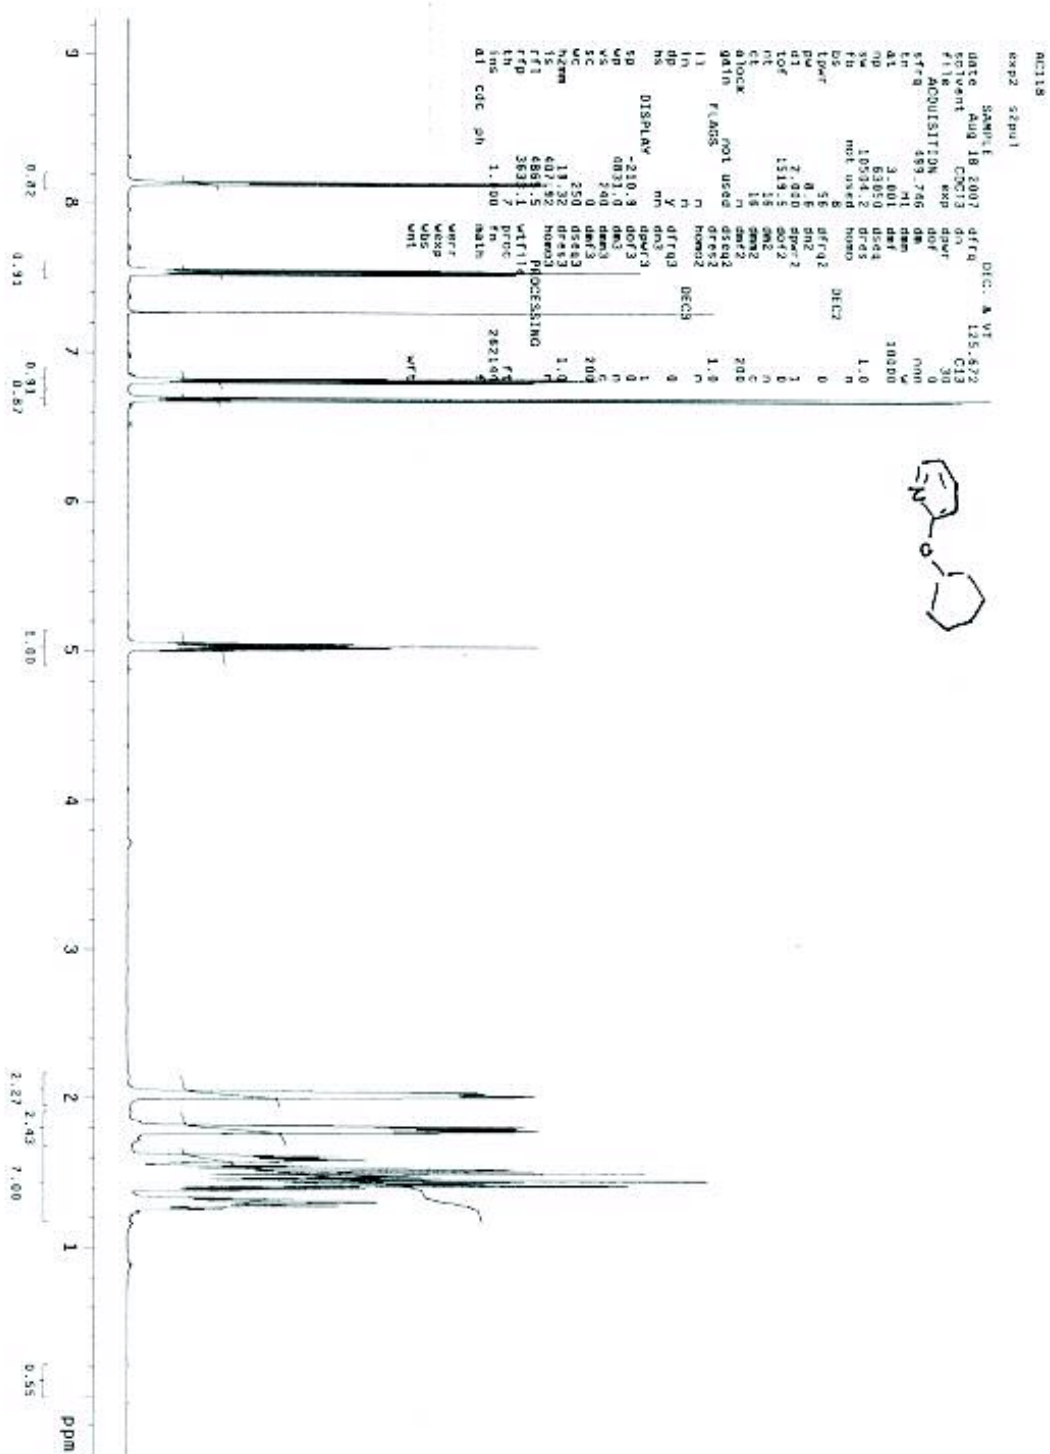







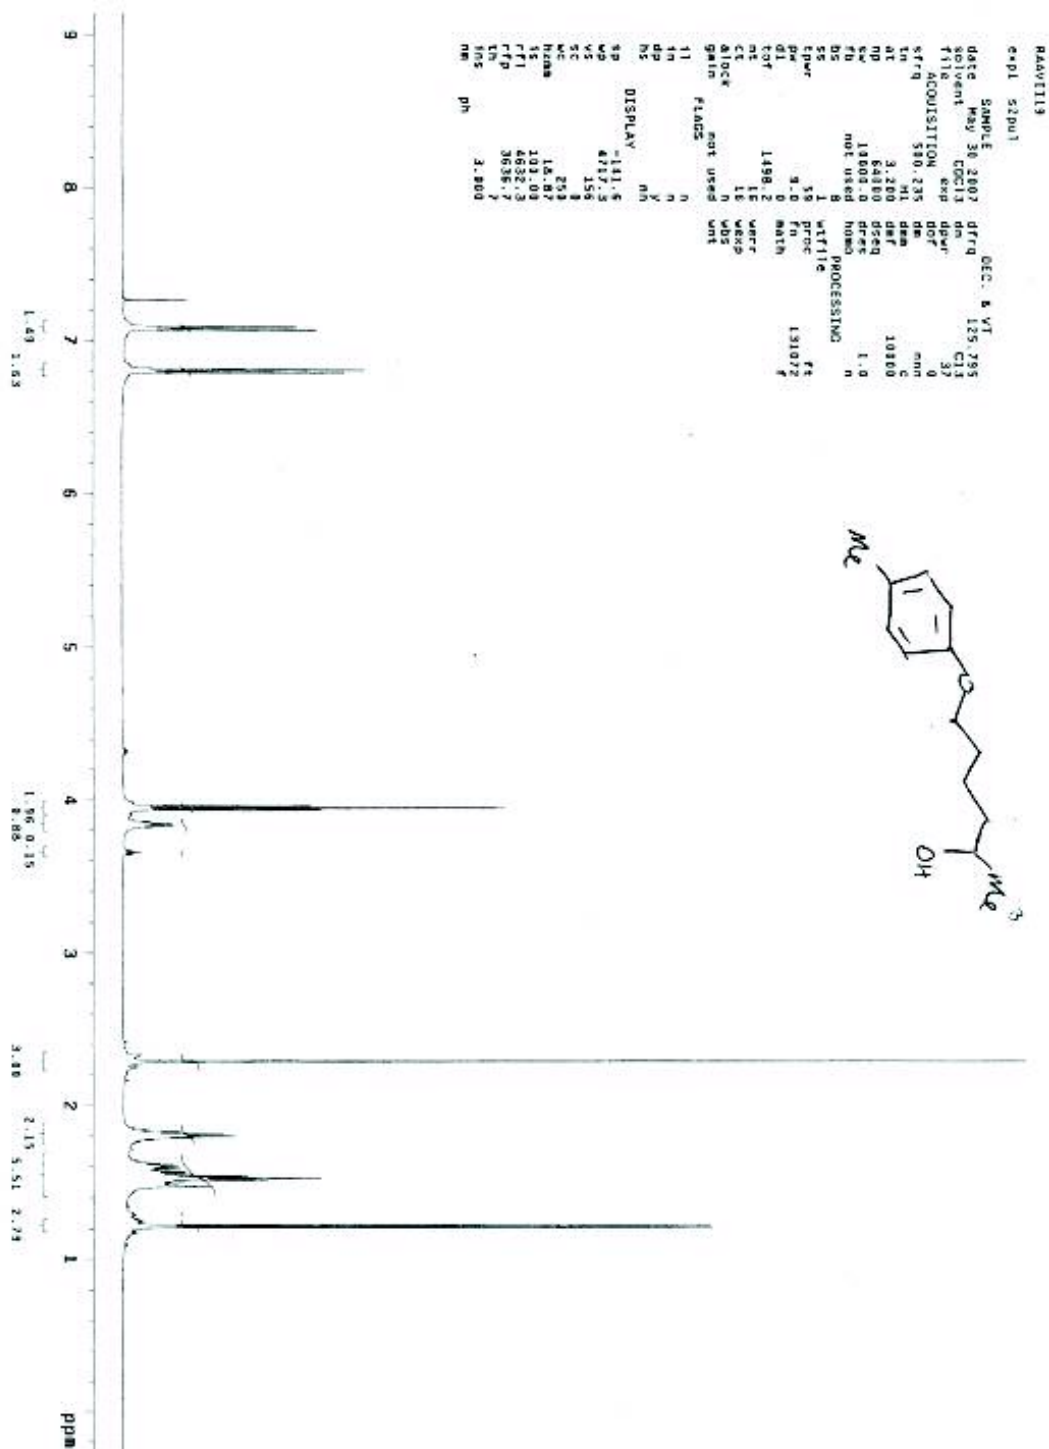

## STANDARD 1H OBSERV

A4000

expt stidh

SAMPLE

date Aug 10 2007 offg DEC. 6 UT 308.180

solvent CDCl3 dn H2

11/10/07/2007/1-00F 38

house/11/10/2007/1-00F 38

/Mha1/01107-00F 38

ACQUISITION 308.101

PROC 308.101

FT 131372

NS 4.083

SW 4.083

FB not used

BS 16

SPW 54

NU 8.0

SI 8.0

TOF 8.0

AT 8.0

CT 16

OT 16

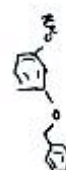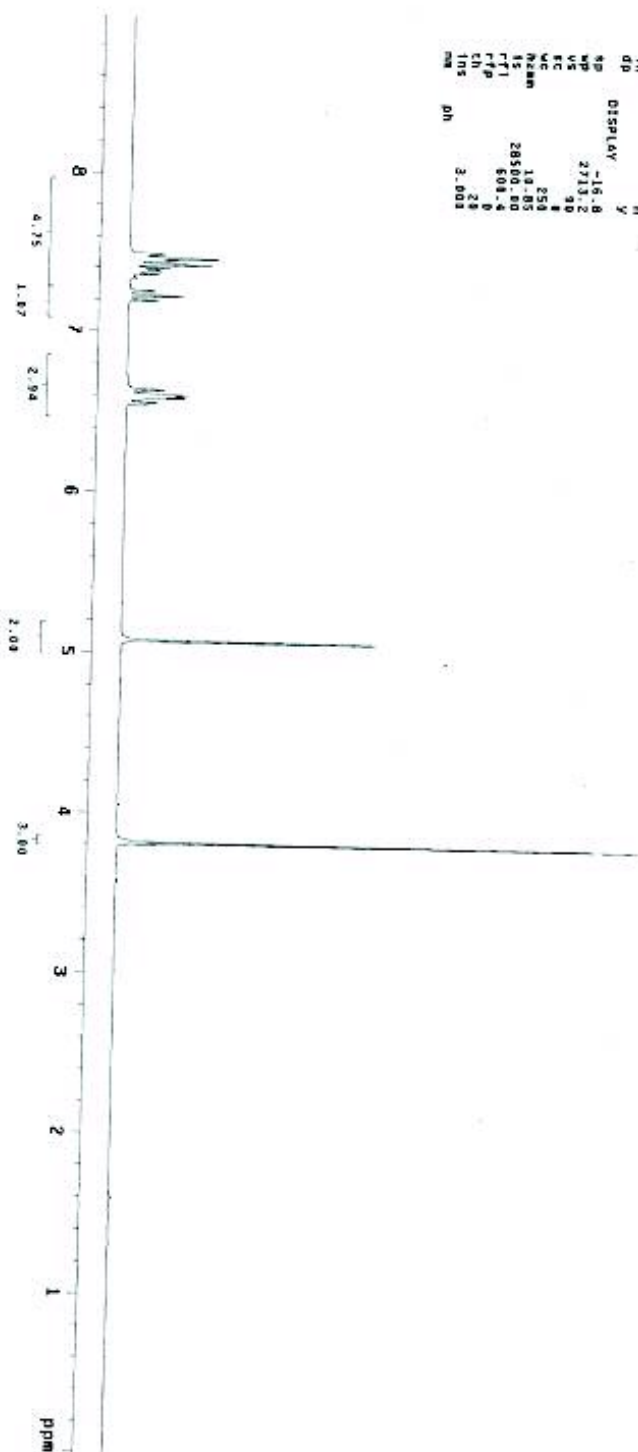

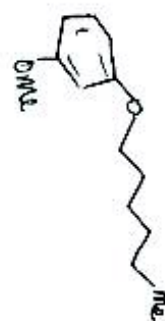[illegible]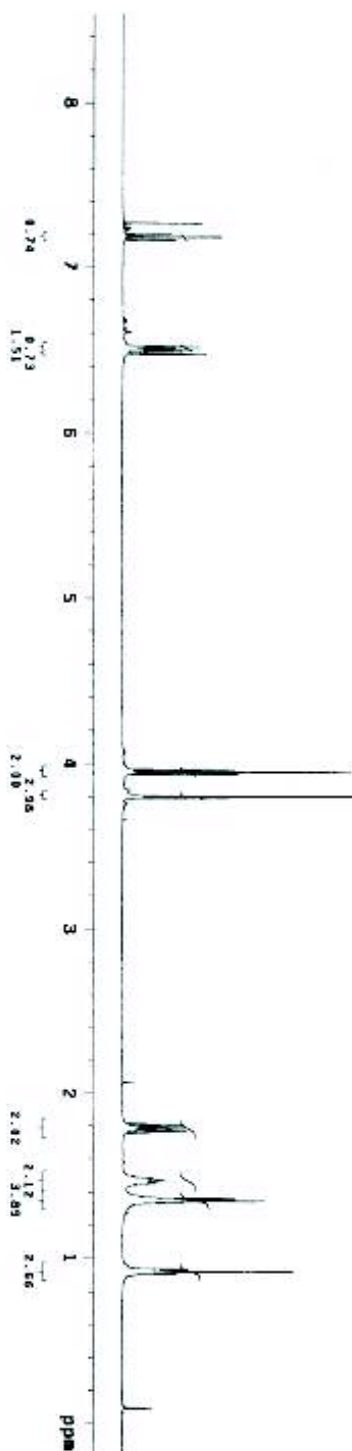

## References

- 
- <sup>i</sup> Stewart, D.; McHattie, G. S.; Imrie, C. T. *J. Mater. Chem.* **1998**, 8, 47 - 52.□
- <sup>ii</sup> Dalal et al. *J. Indian Chem. Soc.* **1958**, 35 745 - 747.□
- <sup>iii</sup> Robbins, T. A.; Knobler, C. B.; Bellew, D. R.; Cram, D. J. *J. Am. Chem. Soc.* **1994**, 116, 111 - 122.□
- <sup>iv</sup> Lajis, N. H.; Khan, M. N.; Hassan, H. A. *Tetrahedron* **1993**, 49, 3405-3410.□
- <sup>v</sup> Sharma, G. V. M.; Ilangoan, A.; Sreenivas, P.; Mahalingam, A. K. *Syn. Lett.* **2000**, 615 - 618.
- <sup>vi</sup> Chandrasekhar, S.; Prakash, S. J.; Rao, C. L. *J. Org. Chem.* **2006**, 71, 2196 - 2199.□
- <sup>vii</sup> Prepared using the procedure described in the following paper: Zhang, Xin-Ge; Zhang, Hui-Jie; Wang, Zhen; Li, Chao-Xing, *Jiegou Huaxue*, **2006**, 25, 300 - 304.
- <sup>viii</sup> Wolter, M.; Nordmann, G.; Job, G. E.; Buchwald, S. L. *Org. Lett.* **2002**, 4, 973 - 976.□
- <sup>ix</sup> Torraca, K. E.; Huang, X.; Parrish, C. A.; Buchwald, S. L. *J. Am. Chem. Soc.* **2001**, 123, 10770 - 10771.□
- <sup>x</sup> Ruhland, T.; Andersen, K.; Pedersen, H. *J. Org. Chem.* **1998**, 63, 9204 - 9211.□
